# Supplementary material for: A method for the direct measurement of surface tension of atmospherically relevant aerosol particles using atomic force microscopy
Source: Copernicus journal article supplement (doi:10.5194/acp-2016-35), 2016-01-19
Supplement: Supplementary file [file acp-2016-35-AC1-supplement.zip]

1 **A method for the direct measurement of surface tension of**  
2 **collected atmospherically relevant aerosol particles using**  
3 **atomic force microscopy**

4

5 **A. D. Hritz, T. M. Raymond, and D. D. Dutcher**

6 {Bucknell University, Lewisburg, Pennsylvania}

7 Correspondence to: D. D. Dutcher (dabrina.dutcher@bucknell.edu)

8

## 1 **Abstract**

2 Accurate estimates of particle surface tension are required for models concerning atmospheric  
3 aerosol nucleation and activation. However, it is difficult to collect the volumes of atmospheric  
4 aerosol required by typical instruments that measure surface tension, such as goniometers or  
5 Wilhelmy plates. In this work, a method that measures, *ex-situ*, the surface tension of collected  
6 liquid nanoparticles using atomic force microscopy is presented. A film of particles is collected  
7 via impaction and is probed using nanoneedle tips with the atomic force microscope. This  
8 micro-Wilhelmy method allows for direct measurements of the surface tension of small  
9 amounts of sample.

10 This method was verified using liquids whose surface tensions were known. Particles of ozone  
11 oxidized  $\alpha$ -pinene, a well-characterized system, were then produced, collected, and analyzed  
12 using this method to demonstrate its applicability for liquid aerosol samples. It was determined  
13 that oxidized  $\alpha$ -pinene particles formed in dry conditions have a surface tension similar to that  
14 of pure  $\alpha$ -pinene, and oxidized  $\alpha$ -pinene particles formed in more humid conditions have a  
15 surface tension that is significantly higher.

16

## 17 **1 Introduction**

18 According to the Fifth Assessment Report of the Intergovernmental Panel on Climate Change,  
19 clouds and aerosols contribute the largest uncertainty to understanding changes in climate  
20 (Boucher et al. 2013). Aerosols affect the climate directly by reflecting or absorbing solar  
21 radiation, and indirectly when they form cloud particles (Boucher et al. 2013). A major  
22 difficulty in modeling particle nucleation and aerosol activation lies in determining physical  
23 properties of particles on the nanoscale without precise knowledge about chemical composition.

24 Recent studies in particle nucleation and cloud droplet activation have used various methods to  
25 estimate particle surface tension, which is a very important parameter in modeling both  
26 processes (Duplissy et al. 2008, Kiss et al. 2005, Laaksonen and McGraw 1996, Moldanova  
27 and Ljungström 2000, Petters et al. 2009, Prisle et al. 2010, Sorjamaa et al. 2004, Wex et al.  
28 2009). Particle nucleation is described by the Kelvin equation (Laaksonen and McGraw 1996),  
29 which requires knowledge about surface tension of the nucleating particle (Laaksonen and  
30 McGraw 1996, Schmelzer et al. 1996). Not surprisingly, direct measurement of the surface  
31 tension of particles near activation state conditions has not been possible. Studies on nucleation

1 often rely on an assumption about the composition and use compiled values for bulk surface  
2 tension including values extrapolated from other phases, estimated or interpolated from similar  
3 compounds or simply assume “physically reasonable values“ (Daisey and Hopke 1993,  
4 Moldanova and Ljungström 2000). Hansen et al. (2015), demonstrated the magnitude of the  
5 error that can occur when commonly made assumptions about surface tensions are used in  
6 models. A direct method of measuring the surface tensions of particles immediately after  
7 nucleation is preferable to these assumptions and would likely reduce the error in particle  
8 nucleation models.

9 Köhler theory is used to predict the properties of activating cloud condensation nuclei (Köhler,  
10 1936). The Köhler equation balances the Kelvin effect with Raoult’s Law in order to describe  
11 particle activation. The Köhler equation applies equilibrium thermodynamics to describe the  
12 process in which water vapor condenses to form liquid droplets.

$$13 \quad \ln \left( \frac{p_w(D_p)}{p^0} \right) = \frac{4M_w\sigma_w}{RT\rho_w D_p} - \frac{6n_s M_w}{\pi\rho_w D_p^3} \quad (1)$$

14 where, T=absolute temperature, R=ideal gas constant,  $p_w$ =droplet water vapor pressure,  
15  $p_0$ =saturation vapor pressure over a flat surface,  $\sigma_w$ =droplet surface tension,  $\rho_w$ =density of pure  
16 water,  $n_s$ =moles of solute,  $M_w$ =molecular weight of water,  $D_p$ =droplet diameter (Köhler 1936).  
17 Thus, similar problems arise in specifying physical properties used in the Kelvin term of the  
18 Köhler equation. To date, there has been little consistency between assumptions used for the  
19 activated particles’ surface tensions. Many researchers (Conant et al. 2002, Huff Hartz et al.  
20 2005, Petters and Kreidenweis 2007, Prenni et al. 2007) have assumed that, at activation, the  
21 particles consist mainly of water, so a surface tension of pure water was used. Though this is a  
22 reasonable initial assumption, it neglects the depressive effect of organic surfactants on the  
23 activating particles’ surface tensions (Facchini et al. 1999, Kiss et al. 2005). It is now generally  
24 agreed upon that, for most activating particles with these surfactants, the surface tension is  
25 reduced by about 10-15% (Asa-Awuku et al. 2010, Engelhart et al. 2008, Facchini et al. 2000,  
26 King et al. 2009). Several methods have been used to predict this surface tension reduction.  
27 Some researchers have collected particles and diluted them so as to allow for a direct  
28 measurement using conventional instruments (Asa-Awuku et al. 2008, Henning et al. 2005,  
29 Moore et al. 2008, Schwier et al. 2013). These values were then extrapolated back to the initial  
30 concentration by fitting them to a Szyskowski-Langmuir isotherm. Occasionally, surface  
31 tensions for the particles have been back-calculated using Köhler Theory Analysis when all  
32 other parameters are known or estimated (Asa-Awuku et al. 2010, Engelhart et al. 2008). Others

1 (Kiss et al. 2005, Raymond and Pandis 2002) have prepared solutions mimicking the bulk  
2 chemical composition of aerosol particles and directly measured their surface tensions.  
3 However, none of these methods directly measures the surface tension of the actual particles in  
4 question.

5 Yazdanpanah (Yazdanpanah et al. 2008) has developed a method to measure the surface tension  
6 of small (~200 nm in diameter) droplets and films using constant-diameter nanoneedle tips on  
7 the atomic force microscope. In this work, we will show how his method has been adapted to  
8 accurately measure the surface tensions of collected atmospheric aerosols.

9

## 10 **2 Experimental Methods**

11

### 12 **2.1 Particle Generation**

13 In this project, oxidized  $\alpha$ -pinene particles were generated in a 1 m<sup>3</sup> polytetrafluoroethylene  
14 (PTFE) smog chamber (Fig. 1). Particles were formed in either “dry“ (<5% RH) or “wet“ (67%  
15 RH) conditions. To generate the “dry“ conditions, the chamber was flushed with clean, dry air  
16 for several hours. Compressed air was cleaned using a TSI 3074B filtered air supply. To  
17 generate the “wet“ conditions, clean air was bubbled through water at 2 liters per minute (LPM),  
18 filtered, and sent to the smog chamber. The chamber was flushed with this humid air stream  
19 until a maximum relative humidity was reached. Relative humidity was measured using a  
20 Vaisala HM337 Humidity and Temperature Transmitter. Neither the water content of the  
21 particles nor the surface tensions of the particles generated under dry and wet conditions are  
22 likely to be directly proportional to the relative humidities (Jonsson et al. 2007).

23 During experiments, the dry, cleaned air stream was sent into the smog chamber at 2 LPM. This  
24 air stream could be diverted either through a sample port or through an ozone generator  
25 (Poseidon Ozone Generator by Ozotech) in series with a HEPA filter before entering the  
26 chamber. An outlet port from the chamber could be connected either to a scanning mobility  
27 particle sizer (a 3080 TSI Differential Mobility Analyzer in series with the 3775 TSI  
28 Condensation Particle Counter) or a cascade impactor (I-1L Cascade impactor by PIXE).  
29 Experiments were only conducted when the initial particle concentration in the smog chamber  
30 was below 100 particles/cm<sup>3</sup>, as measured by the scanning mobility particle sizer (SMPS).

1 At the start of each experiment, ozone was added to the smog chamber. If particle counts in the  
2 smog chamber remained low after about five minutes, indicating a chamber free of oxidizable  
3 volatile organic compounds, 5  $\mu\text{L}$  of liquid  $\alpha$ -pinene (97% pure, Acros Organics) was then  
4 injected into a sample port, where it was vaporized and carried into the smog chamber. Ozone  
5 and  $\alpha$ -pinene were added in a roughly 1:1 molar ratio; the high starting concentrations were  
6 necessary so that an adequate particle volume would form for collection later. The resulting  
7 oxidized  $\alpha$ -pinene particles were allowed to age in the chamber for 90 minutes. The ozone-  
8  $\alpha$ -pinene system was selected because it is one of the more, if not the most, characterized  
9 SOA systems. Speciation and chemical characterization results from similar systems have been  
10 reported by various researchers (e.g. Jang and Kamens 1999, Praplan et al. 2015, Tu et al. 2016,  
11 Yu et al. 1999).

12 During the aging process, particle size distribution data was collected with the SMPS. The  
13 SMPS sample flow rate was 0.3 LPM and the sheath flow rate used on the Differential Mobility  
14 Analyzer (DMA) was 3 LPM. These settings allowed for collection of particle size distribution  
15 data over the range of 15 to 660 nm. The low sampling flow rate ensured that the smog chamber  
16 operated under positive pressure. The size of the oxidized  $\alpha$ -pinene particles followed a log-  
17 normal distribution whose center shifted to larger sizes over time. In the period where particles  
18 aged, the modal diameter increased from around 120 to 200 nm. The most significant changes  
19 in particle size distribution occurred in the first hour after the  $\alpha$ -pinene was introduced to the  
20 smog chamber. The 90 minute aging period ensured minimal changes in particle size  
21 distribution during collection. A schematic of the experimental set-up is shown in Figure 1.

22

## 23 **2.2 Particle Collection**

24 Ninety minutes after  $\alpha$ -pinene was introduced to the smog chamber, the outlet of the chamber  
25 was switched to feed to the cascade impactor. The second smallest stage (L2) was used to  
26 collect the particles on a cleaned steel disk. The 50% aerodynamic cutoff diameter for this stage  
27 at 4 LPM was 40 nm. After 90 minutes a visible particle film had collected on the disk. The  
28 particles deposit in a circular region  $\sim 6$  mm in diameter on the steel disc. The steel disc before  
29 and after sample collection was imaged using a ScanAsyst and PeakForce Tapping-mode AFM  
30 microscope. These images are displayed in Figure 2a and 2b. These images show that the steel  
31 disk is rough. After sampling the surface is smoother indicating that the sample flowed and

1 filled in the roughness. Two traces, centered vertically and horizontally, from each image are  
2 shown in Figure 2c.

### 3 **2.3 Sample Analysis**

4 A Veeco Multimode V Atomic Force Microscope (AFM) and NugaNeedle NN-HAR-FM60  
5 probes were used to analyze the particle film collected on the disk. The probes consist of a flat,  
6 flexible cantilever, and a nanoneedle mounted normally to the cantilever at its end. The Ga-Ag  
7 nanoneedles are shaped as cylinders on the order of 100 nm in diameter and 10  $\mu\text{m}$  in length.  
8 A micro-Wilhelmy method developed by Yazdanpanah et al. (2008), described below, was then  
9 used to measure the surface tension of the samples.

10 The sample was analyzed with the AFM in force mode. In this mode, the AFM's piezoelectric  
11 transducers push the sample film up to and away from the probe with high precision. The  
12 downward force exerted on the probe was recorded by the AFM as a function of its location  
13 relative to the film's surface. A force curve obtained with the AFM is presented in Fig. 2.

14 In Fig. 2, the curve in blue illustrates the force exerted on the probe as it approaches and touches  
15 the sample surface. The curve in red illustrates the force exerted on the probe as it is pulled  
16 from the sample. If it is assumed that only forces related to the surface tension of the liquid film  
17 are exerted on the probe, then equation 2 holds:

$$18 \quad F_{probe} = \sigma * L * \cos(\theta) \quad (2)$$

19

20 where  $\sigma$  is the surface tension of the sample,  $L$  is the wetted perimeter of the tip, and  $\theta$  is the  
21 contact angle between the fluid and the tip. For a more complete derivation of this equation see  
22 (Yum and Yu 2006).

23 Because the nanoneedle has a cylindrical geometry, the wetted perimeter,  $L$ , is constant during  
24 all force measurements. This can be seen by the near-constant negative force exerted on the  
25 probe when it is initially retracting out of the sample. The increase in the downward force before  
26 the nanoneedle is completely pulled from the sample is attributed to a decrease in the contact  
27 angle. At the point the sample breaks away from the nanoneedle, the contact angle is zero.  
28 When this angle is zero and the needle is smaller than the capillary length (Uddin et al. 2011),  
29 equation 2 holds:

1  
2  
3  
4  
5  
6  
7  
8  
9  
10  
11  
12  
13  
14  
15  
16  
17  
18  
19  
20  
21  
22  
23  
24  
25  
26  
27  
28  
29  
30

$$\sigma = \frac{F_{probe}}{L} \quad (2)$$

For this project, equation 2 was used (Padday et al. 1975), using the force reading at the point the nanoneedle broke from the sample. This corresponds to point 5 in Figure 3. The magnitude of the force at the break-away step suggests that the collected sample is liquid rather than a glassy or amorphous solid observed for some oxidized VOC systems.

Several aspects of the AFM system were calibrated daily before the collected  $\alpha$ -pinene particles were analyzed, typically during particle collection. Because the AFM directly measures the deflection of the cantilever, a force exerted on the nanoneedle could only be obtained after calibrating the cantilever's deflection and determining its spring constant. In the AFM, a laser is reflected off of the cantilever into a photodetector; cantilever deflection is measured by the movement of the laser on the photodetector. To calibrate this measurement, the probe was gently pushed into a hard, steel surface. The slope of the force curve when the probe is in contact with the surface indicates the observed cantilever deflection from the photodetector (y-axis of the force curve) versus the actual distance the surface is moving the cantilever (x-axis of the force curve). This slope was entered into the AFM's operating program.

The spring constant of the tip was found using a thermal tune. The thermal tune is a common method to calculate spring constant using measurements of the cantilever's response to thermal noise (Serry 2005). The native Veeco software was used to perform the thermal tune. After these calibrations, the AFM will produce force curves that relate force and distance accurately.

In order to calculate surface tension from force data, the wetted perimeter of the nanoneedle also had to be obtained. This was done by obtaining force curves of liquid standards and using equation 2 to back-calculate the wetted perimeter given force and surface tension information. Two liquid standards were used: 90% pure oleic acid (Sigma-Aldrich) and 97% pure, non-oxidized liquid  $\alpha$ -pinene. The surface tensions of these two standards were measured using a Wilhelmy plate (Sigma 703D, KSV Instruments Ltd.); results are shown in Table 1. Measurements for the standards yielded lower values compared to the literature for pure oleic acid and  $\alpha$ -pinene. Because the standards were not completely pure, this was not unexpected, and surface tension values obtained from the Wilhelmy plate were used.

1 A summary of the steps used to calibrate and analyze samples on the AFM is shown in Figure  
2 4.

3

### 4 **3 Results and Discussion**

5 Surface tension data was obtained for oxidized  $\alpha$ -pinene particles. The AFM's measurements  
6 and calculated values are presented in Table 2. Both "dry" oxidized  $\alpha$ -pinene particles and "wet"  
7 oxidized  $\alpha$ -pinene particles were analyzed. The mean surface tension of "dry" oxidized  $\alpha$ -  
8 pinene particles was found to be 27.5 dyn cm<sup>-1</sup> at 23 degrees C, with an average uncertainty of  
9 1.1 dyn cm<sup>-1</sup>. This is similar to the surface tension of pure  $\alpha$ -pinene as reported in the literature  
10 (Daisey and Hopke 1993) and measured with our Wilhelmy plate. The mean surface tension of  
11 "wet" oxidized  $\alpha$ -pinene particles was found to be 44.4 dyn cm<sup>-1</sup> at 23 degrees C, with an  
12 uncertainty of 2.4 dyn cm<sup>-1</sup>.

13 The results presented in Table 2 include a set of standards which were done for every set of  
14 measurements. The purpose of this standard was to allow the determination of the perimeter of  
15 the nano-needle. For the first set of reported measurements, a check standard was also added  
16 to verify that the perimeter measurement was correct. This check standard is not required for  
17 each set of measurements. The surface tensions measured here were compared to the surface  
18 tensions of the standards measured and presented in Table 1.

19 Table 3 compares the mean surface tensions of oxidized  $\alpha$ -pinene particles measured in this  
20 study with published estimates for the surface tension of activating, oxidized  $\alpha$ -pinene particles  
21 (Engelhart et al. 2008, Huff Hartz et al. 2005, Prenni et al. 2007). Our results suggest that the  
22 surface tension of dry oxidized  $\alpha$ -pinene particles is not very different from the surface tension  
23 of its VOC precursor. It is also apparent that the surface tension of oxidized  $\alpha$ -pinene particles  
24 formed in more humid conditions had a higher surface tension than oxidized  $\alpha$ -pinene particles  
25 formed in dry conditions.

26 These results appear to be in agreement with current theory. It is generally believed that the  
27 surface tension of an activating oxidized  $\alpha$ -pinene particle is slightly lower than that of pure  
28 water, at 61.7 dyn cm<sup>-1</sup> (Engelhart et al. 2008). This is due to the depressive effect of organic  
29 surfactants in the droplets. The results from the particles generated at the higher of two  
30 humidities suggest that the surface tension is between the surface tension of pure water and the  
31 surface tension of the dry oxidized  $\alpha$ -pinene. This relationship is unlikely to be directly linear



1 given that additive surface tensions only apply to chemicals with similar properties which water  
2 and the organics produced from the oxidation of alpha-pinene are not. Furthermore, the surface  
3 tension of the dry oxidized  $\alpha$ -pinene particles was found to be similar to the surface tension of  
4 pure  $\alpha$ -pinene. This similarity in properties may be due to their similar structures. Now that a  
5 method suitable for the direct measurement of particle surface tension has been established,  
6 direct measurements of particles with several other moisture contents should be taken to  
7 examine the precise relationship between surface tension and moisture content in a particle.  
8 With modifications to the particle generation technique, this method can be used to  
9 experimentally measure the surface tension of activating particles.

10

#### 11 **4 Conclusions**

12 A method was developed to measure the surface tension of collected liquid aerosol particles  
13 using atomic force microscopy. Particles are impacted on a clean surface until a film is formed,  
14 then probed with a clean tip in an atomic force microscope. This method minimizes processing  
15 of the particles and therefore reduces the risk of sample contamination. The method was verified  
16 and calibrated using standard liquids whose surface tensions were in the range of the sample  
17 specimens. The standard liquid surface tensions were checked with a Wilhelmy plate. This  
18 method does not measure single particle surface tension but does dramatically reduce the  
19 required amount of material required to make bulk measurements.

20 Relatively dry, oxidized  $\alpha$ -pinene particles were found to have a surface tension similar to that  
21 of pure liquid  $\alpha$ -pinene. Oxidized  $\alpha$ -pinene particles with higher moisture content were found  
22 to have a surface tension significantly higher than that of pure  $\alpha$ -pinene, but lower than current  
23 assumptions for the surface tension of activating oxidized  $\alpha$ -pinene particles. These preliminary  
24 results are consistent with the assumption of surface tension depression currently used to  
25 approximate the surface tension of activating aerosol particles. With modifications to the  
26 particle generation technique, this method can be used to experimentally measure the surface  
27 tension of particles closer to activation conditions.

28

#### 29 **Acknowledgements**

30 The authors thank NaugaNeedles and Dr. Mehdi Yazdanpanah for supplying the tips for the  
31 atomic force microscope and assisting in developing the methods described in this paper. The

1 authors also thank Drs. James Maneval and Ray Dagastine for their assistance. The authors  
2 also appreciate the efforts of Raleigh Casebolt for some of the imaging.  
3

1 **References:**

- 2 Asa-Awuku, A., Nenes, A., Gao, S., Flagan, R. and Seinfeld, J.: Water-soluble SOA from  
3 Alkene ozonolysis: composition and droplet activation kinetics inferences from analysis of  
4 CCN activity, *Atmospheric Chemistry and Physics*, 10, 1585-1597, 2010.
- 5 Asa-Awuku, A., Sullivan, A., Hennigan, C., Weber, R. and Nenes, A.: Investigation of molar  
6 volume and surfactant characteristics of water-soluble organic compounds in biomass burning  
7 aerosol, *Atmospheric Chemistry and Physics*, 8, 799-812, 2008.
- 8 Boucher, O., Randall, D., Artaxo, P., Bretherton, C., Feingold, G., Forster, P., Kerminen, V.,  
9 Kondo, Y., Liao, H. and Lohmann, U.: Clouds and aerosols, in: *Climate change 2013: The  
10 physical science basis. Contribution of working group I to the fifth assessment report of the  
11 intergovernmental panel on climate change*, Cambridge University Press, 571-657, 2013.
- 12 Conant, W. C., Nenes, A. and Seinfeld, J. H.: Black carbon radiative heating effects on cloud  
13 microphysics and implications for the aerosol indirect effect 1. Extended Köhler theory,  
14 *Journal of Geophysical Research: Atmospheres*, 107, 2002.
- 15 Daisey, J. M. and Hopke, P. K.: Potential for ion-induced nucleation of volatile organic  
16 compounds by radon decay in indoor environments, *Aerosol science and technology*, 19, 80-  
17 93, 1993.
- 18 Duplissy, J., Gysel, M., Alfarra, M., Dommen, J., Metzger, A., Prevot, A., Weingartner, E.,  
19 Laaksonen, A., Raatikainen, T. and Good, N.: Cloud forming potential of secondary organic  
20 aerosol under near atmospheric conditions, *Geophys. Res. Lett.*, 35, 2008.
- 21 Engelhart, G., Asa-Awuku, A., Nenes, A. and Pandis, S.: CCN activity and droplet growth  
22 kinetics of fresh and aged monoterpene secondary organic aerosol, *Atmospheric Chemistry  
23 and Physics*, 8, 3937-3949, 2008.
- 24 Facchini, M. C., Decesari, S., Mircea, M., Fuzzi, S. and Loglio, G.: Surface tension of  
25 atmospheric wet aerosol and cloud/fog droplets in relation to their organic carbon content and  
26 chemical composition, *Atmos. Environ.*, 34, 4853-4857, 2000.
- 27 Facchini, M. C., Mircea, M., Fuzzi, S. and Charlson, R. J.: Cloud albedo enhancement by  
28 surface-active organic solutes in growing droplets, *Nature*, 401, 257-259, 1999.
- 29 Hansen, A. M. K., Hong, J., Raatikainen, T., Kristensen, K., Ylisirniö, A., Virtanen, A.,  
30 Petäjä, T., Glasius, M. and Prisle, N. L.: Hygroscopic properties and cloud condensation  
31 nuclei activation of limonene-derived organosulfates and their mixtures with ammonium  
32 sulfate, *Atmospheric Chemistry and Physics*, 15, 14071-14089, 2015.
- 33 Henning, S., Rosenørn, T., D'Anna, B., Gola, A., Svenningsson, B. and Bilde, M.: Cloud  
34 droplet activation and surface tension of mixtures of slightly soluble organics and inorganic  
35 salt, *Atmospheric Chemistry and Physics*, 5, 575-582, 2005.
- 36 Huff Hartz, K. E., Rosenørn, T., Ferchak, S. R., Raymond, T. M., Bilde, M., Donahue, N. M.  
37 and Pandis, S. N.: Cloud condensation nuclei activation of monoterpene and sesquiterpene  
38 secondary organic aerosol, *Journal of Geophysical Research: Atmospheres*, 110, 2005.
- 39 Jang, M. and Kamens, R. M.: Newly characterized products and composition of secondary  
40 aerosols from the reaction of  $\alpha$ -pinene with ozone, *Atmos. Environ.*, 33, 459-474, 1999.
- 41 Jonsson, Å. M., Hallquist, M. and Saathoff, H.: Volatility of secondary organic aerosols from  
42 the ozone initiated oxidation of  $\alpha$ -pinene and limonene, *J. Aerosol Sci.*, 38, 843-852, 2007.

1 King, S. M., Rosenoern, T., Shilling, J. E., Chen, Q. and Martin, S. T.: Increased cloud  
2 activation potential of secondary organic aerosol for atmospheric mass loadings, *Atmospheric*  
3 *Chemistry and Physics*, 9, 2959-2971, 2009.

4 Kiss, G., Tombácz, E. and Hansson, H.: Surface tension effects of humic-like substances in  
5 the aqueous extract of tropospheric fine aerosol, *J. Atmos. Chem.*, 50, 279-294, 2005.

6 Köhler, H.: The nucleus in and the growth of hygroscopic droplets, *Transactions of the*  
7 *Faraday Society*, 32, 1152-1161, 1936.

8 Laaksonen, A. and McGraw, R.: Thermodynamics, gas-liquid nucleation, and size-dependent  
9 surface tension, *EPL (Europhysics Letters)*, 35, 367, 1996.

10 Moldanova, J. and Ljungström, E.: Modelling of particle formation from NO<sub>3</sub> oxidation of  
11 selected monoterpenes, *J. Aerosol Sci.*, 31, 1317-1333, 2000.

12 Moore, R., Ingall, E., Sorooshian, A. and Nenes, A.: Molar mass, surface tension, and droplet  
13 growth kinetics of marine organics from measurements of CCN activity, *Geophys. Res. Lett.*,  
14 35, 2008.

15 Padday, J., Pitt, A. and Pashley, R.: Menisci at a free liquid surface: surface tension from the  
16 maximum pull on a rod, *Journal of the Chemical Society, Faraday Transactions 1: Physical*  
17 *Chemistry in Condensed Phases*, 71, 1919-1931, 1975.

18 Petters, M. and Kreidenweis, S.: A single parameter representation of hygroscopic growth and  
19 cloud condensation nucleus activity, *Atmospheric Chemistry and Physics*, 7, 1961-1971,  
20 2007.

21 Petters, M., Wex, H., Carrico, C., Hallbauer, E., Massling, A., McMeeking, G., Poulain, L.,  
22 Wu, Z., Kreidenweis, S. and Stratmann, F.: Towards closing the gap between hygroscopic  
23 growth and activation for secondary organic aerosol—Part 2: Theoretical approaches,  
24 *Atmospheric Chemistry and Physics*, 9, 3999-4009, 2009.

25 Praplan, A., Schobesberger, S., Bianchi, F., Rissanen, M., Ehn, M., Jokinen, T., Junninen, H.,  
26 Adamov, A., Amorim, A. and Dommen, J.: Elemental composition and clustering behaviour  
27 of  $\alpha$ -pinene oxidation products for different oxidation conditions, *Atmospheric Chemistry and*  
28 *Physics*, 15, 4145-4159, 2015.

29 Prenni, A. J., Petters, M. D., Kreidenweis, S. M., DeMott, P. J. and Ziemann, P. J.: Cloud  
30 droplet activation of secondary organic aerosol, *Journal of Geophysical Research:*  
31 *Atmospheres*, 112, 2007.

32 Prisle, N. L., Raatikainen, T., Laaksonen, A. and Bilde, M.: Surfactants in cloud droplet  
33 activation: mixed organic-inorganic particles, *Atmospheric Chemistry and Physics*, 10, 5663-  
34 5683, 2010.

35 Raymond, T. M. and Pandis, S. N.: Cloud activation of single-component organic aerosol  
36 particles, *Journal of Geophysical Research: Atmospheres*, 107, 2002.

37 Schmelzer, J. W., Gutzow, I. and Schmelzer Jr, J.: Curvature-dependent surface tension and  
38 nucleation theory, *J. Colloid Interface Sci.*, 178, 657-665, 1996.

39 Schwier, A., Viglione, G., Li, Z. and Faye McNeill, V.: Modeling the surface tension of  
40 complex, reactive organic-inorganic mixtures, *Atmospheric Chemistry and Physics*, 13,  
41 10721-10732, 2013.

42 Serry, F.: Improving the accuracy of AFM force measurements: The thermal tune solution to  
43 the cantilever spring constant problem, *Veeco Application Notes*, 1-4, 2005.

1 Sorjamaa, R., Svenningsson, B., Raatikainen, T., Henning, S., Bilde, M. and Laaksonen, A.:  
2 The role of surfactants in Köhler theory reconsidered, *Atmospheric Chemistry and Physics*, 4,  
3 2107-2117, 2004.

4 Tu, P., Hall, W. A. and Johnston, M. V.: Characterization of Highly Oxidized Molecules in  
5 Fresh and Aged Biogenic Secondary Organic Aerosol, *Anal. Chem.*, 2016.

6 Uddin, M. H., Tan, S. Y. and Dagastine, R. R.: Novel characterization of microdrops and  
7 microbubbles in emulsions and foams using atomic force microscopy, *Langmuir*, 27, 2536-  
8 2544, 2011.

9 Wex, H., Petters, M., Carrico, C., Hallbauer, E., Massling, A., McMeeking, G., Poulain, L.,  
10 Wu, Z., Kreidenweis, S. and Stratmann, F.: Towards closing the gap between hygroscopic  
11 growth and activation for secondary organic aerosol: Part 1–Evidence from measurements,  
12 *Atmospheric Chemistry and Physics*, 9, 3987-3997, 2009.

13 Yazdanpanah, M. M., Hosseini, M., Pabba, S., Berry, S. M., Dobrokhotoy, V. V., Safir, A.,  
14 Keynton, R. S. and Cohn, R. W.: Micro-wilhelmy and related liquid property measurements  
15 using constant-diameter nanoneedle-tipped atomic force microscope probes, *Langmuir*, 24,  
16 13753-13764, 2008.

17 Yu, J., Cocker III, D. R., Griffin, R. J., Flagan, R. C. and Seinfeld, J. H.: Gas-phase ozone  
18 oxidation of monoterpenes: Gaseous and particulate products, *J. Atmos. Chem.*, 34, 207-258,  
19 1999.

20 Yum, K. and Yu, M.: Measurement of wetting properties of individual boron nitride  
21 nanotubes with the Wilhelmy method using a nanotube-based force sensor, *Nano letters*, 6,  
22 329-333, 2006.

23

24

1 Table 1. Surface tension of bulk liquids used for standardization, measured by the Wilhelmy plate at  
2 23.9 degrees C. Averages reported as “average +/- standard error ( $s/\sqrt{n}$ ).” Pure oleic acid has a surface  
3 tension of 32.79 dyn/cm at 20 degrees C (Chumpitaz et al., 1999), and pure  $\alpha$ -pinene has a surface  
4 tension of 26.0 dyn/cm at 25 degrees C (Daisey and Hopkey, 1993). Measured values on Wilhelmy plate  
5 are close to reported values, considering differences in purity and temperature.

6

| <b>Component</b>              | <b>Surface Tension<br/>(dyn/cm)</b> |
|-------------------------------|-------------------------------------|
| Oleic Acid (90% purity)       | 29.47                               |
|                               | 29.53                               |
| <b>Average</b>                | <b>29.50±0.03</b>                   |
| $\alpha$ -pinene (97% purity) | 25.75                               |
|                               | 25.36                               |
| <b>Average</b>                | <b>25.6±0.2</b>                     |

7

8

9

10

1 Table 2. Measured and calculated values obtained during three experiments. In the first  
 2 experiment,  $\alpha$ -pinene was used as the standard, oleic acid was used as a check standard, and the  
 3 oxidized  $\alpha$ -pinene particles were generated in dry conditions. In the second experiment, oleic  
 4 acid was used as the standard, there was no check standard, and the oxidized  $\alpha$ -pinene particles  
 5 were generated in dry conditions. In the third experiment,  $\alpha$ -pinene was used as the standard,  
 6 there was no check standard, and the oxidized  $\alpha$ -pinene particles were generated in wet  
 7 conditions.

| Experimental conditions                  | Standard                   |                                      | Check Standard             |                                      | Sample Oxidized $\alpha$ -pinene particles |                                     |
|------------------------------------------|----------------------------|--------------------------------------|----------------------------|--------------------------------------|--------------------------------------------|-------------------------------------|
|                                          | Measured Maximum Force(nN) | Calculated Wetted Tip Perimeter (nm) | Measured Maximum Force(nN) | Calculated Wetted Tip Perimeter (nm) | Measured Maximum Force(nN)                 | Calculated Surface Tension (dyn/cm) |
| -Particles generated at <10% RH          | 9.7                        | 377.0                                | 11.0                       | 373.8                                | 10.1                                       | 26.8                                |
| -Standard: $\alpha$ -pinene (97% purity) | 9.6                        | 373.8                                | 10.9                       | 370.7                                | 10.3                                       | 27.4                                |
| -Check Standard: Oleic Acid (90% purity) | 9.7                        | 377.0                                | 10.8                       | 364.4                                | 10.2                                       | 27.0                                |
|                                          |                            |                                      |                            |                                      | 11.4                                       | 30.2                                |
|                                          |                            |                                      |                            |                                      | 10.5                                       | 27.8                                |
| <b>Average</b>                           | <b>375.9±1.1</b>           |                                      | <b>369.7±2.8</b>           |                                      | <b>27.8±0.6</b>                            |                                     |
| -Particles generated at <10% RH          | 11.7                       | 395.8                                |                            |                                      | 10.8                                       | 27.2                                |
| -Standard: Oleic Acid (90% purity)       | 11.8                       | 399.0                                |                            |                                      | 10.6                                       | 26.7                                |
| -Check Standard: None                    | 11.7                       | 395.8                                |                            |                                      | 10.6                                       | 26.8                                |
| <b>Average</b>                           | <b>369.9±1.0</b>           |                                      |                            |                                      | <b>26.9±0.2</b>                            |                                     |
| -Particles generated at 67% RH           | 12.7                       | 496.4                                |                            |                                      | 21.4                                       | 43.3                                |
| -Standard: $\alpha$ -pinene (97% purity) | 12.5                       | 490.1                                |                            |                                      | 21.2                                       | 42.9                                |
| -Check Standard: None                    | 12.6                       | 493.2                                |                            |                                      | 20.6                                       | 41.8                                |
|                                          |                            |                                      |                            |                                      | 22.8                                       | 46.3                                |
|                                          |                            |                                      |                            |                                      | 23.4                                       | 47.5                                |
| <b>Average</b>                           | <b>493.2±1.8</b>           |                                      |                            |                                      | <b>44.4±1.1</b>                            |                                     |

8  
 9  
 10

1 Table 3. Measured and approximated surface tensions of  $\alpha$ -pinene particles. Bulk  $\alpha$ -pinene and dry,  
 2 oxidized  $\alpha$ -pinene particles have a similar surface tension. Wet  $\alpha$ -pinene particles have a higher surface  
 3 tension. Measurements from this study are shown in italicized font, other values are given for context.

4

| RH at particle creation (%) | Surface tension (dyn/cm) | Description, Source                                                                                                       |
|-----------------------------|--------------------------|---------------------------------------------------------------------------------------------------------------------------|
| n/a                         | <b>25.6</b>              | Pure $\alpha$ -pinene, bulk<br>This experiment; Wilhelmy plate                                                            |
| <10                         | <b>27.5</b>              | <i>Oxidized <math>\alpha</math>-pinene particles</i><br><i>This experiment; AFM measurements</i>                          |
| 67                          | <b>44.4</b>              | <i>Oxidized <math>\alpha</math>-pinene particles</i><br><i>This experiment; AFM measurements</i>                          |
| >100<br>(Activation)        | <b>61.7</b>              | Oxidized $\alpha$ -pinene particles, assume depressed surface tension of pure water<br>Engelhart et al., 2008             |
| >100<br>(Activation)        | <b>72.5</b>              | Oxidized $\alpha$ -pinene particles, assume surface tension of pure water<br>Huff Hartz et al., 2005; Prenni et al., 2007 |

5



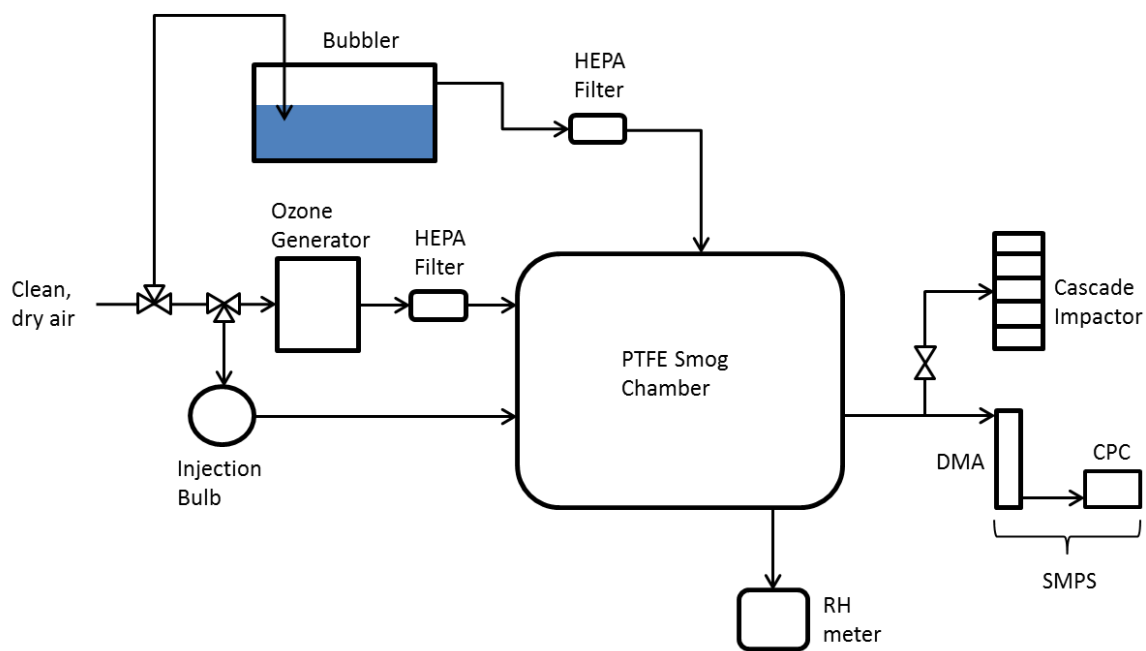

1  
 2 Figure 1. Experimental setup used to generate and collect oxidized  $\alpha$ -pinene particles. The smog  
 3 chamber is initially flushed with dry or wet air. Once the relative humidity in the chamber is  
 4 established, particles are generated in the smog chamber by mixing  $\alpha$ -pinene and ozone.  
 5 Resulting particles are either analyzed with the SMPS or sampled using the cascade impactor.

6  
 7

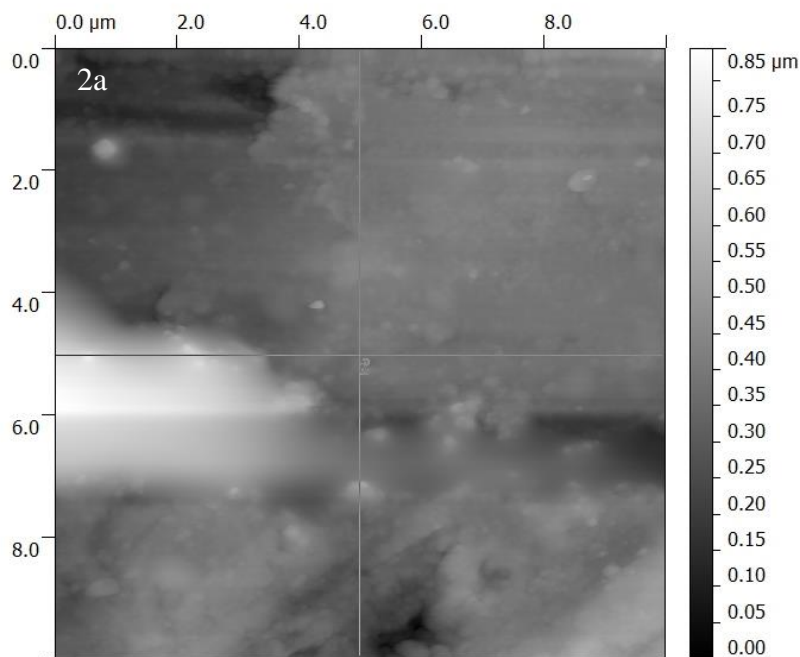

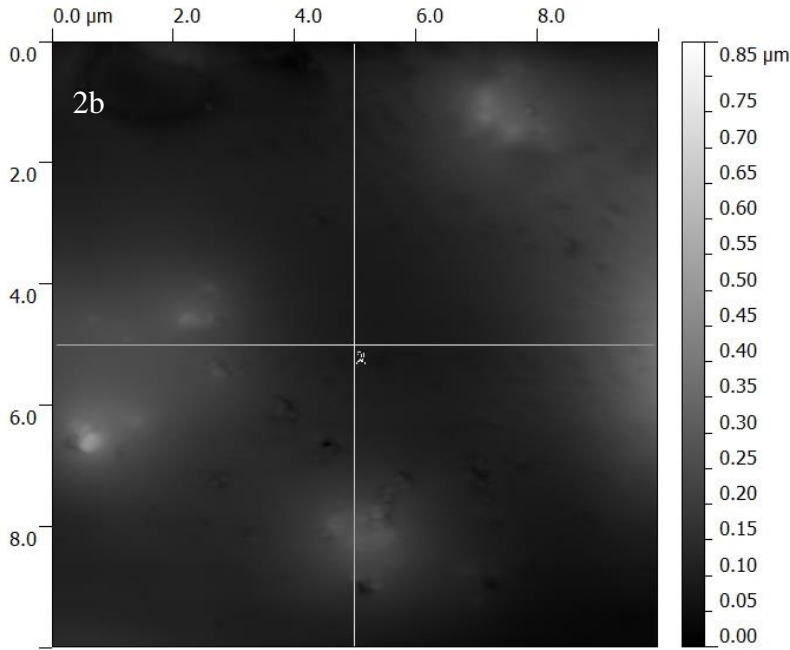

1

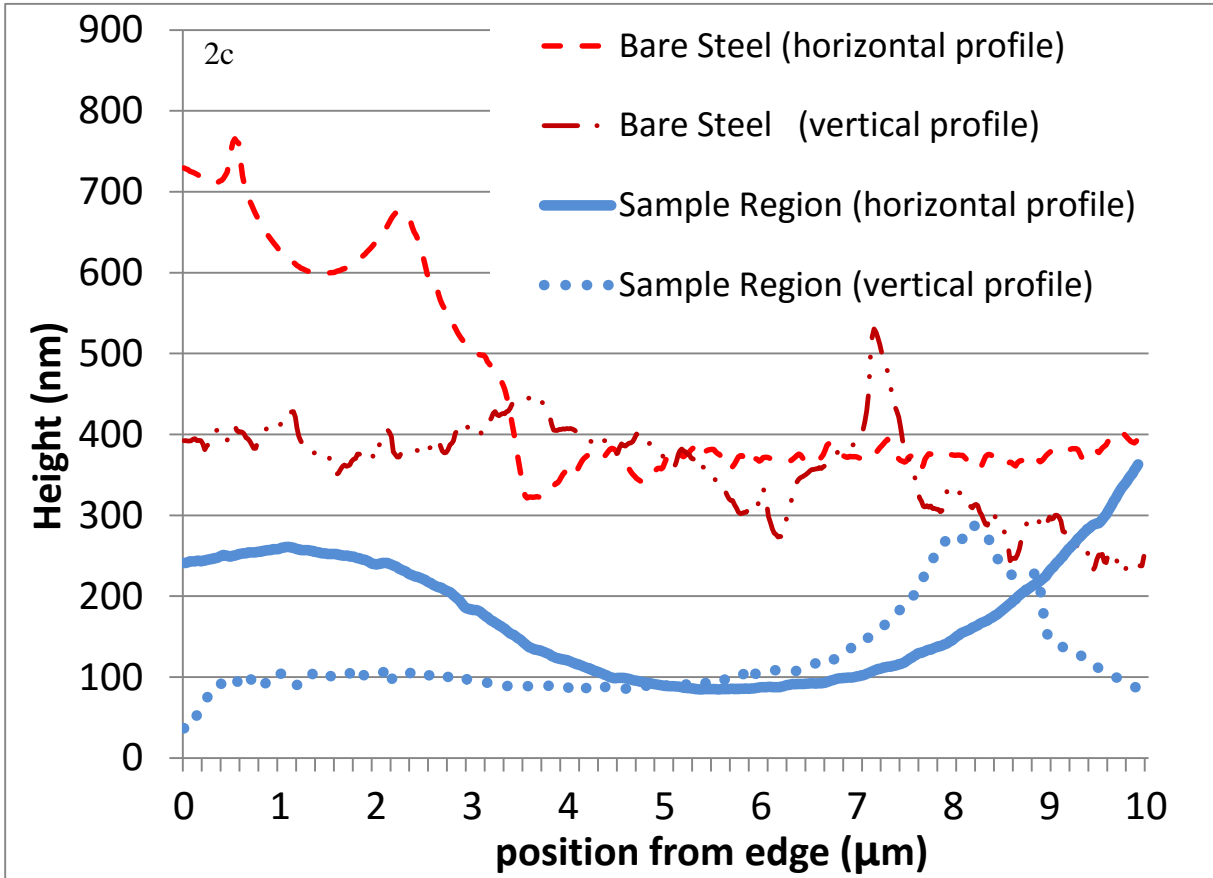

2

3

4 Figures 2a-c. Figure 2a shows an AFM surface scan of cleaned (no sample) puck. The surface  
 5 is rough at this microscopic level. Figure 2b shows an AFM scan of the same puck after

1 sampling. This image was collected in the sample deposit region. It shows that the roughness  
2 gets filled in by the sample. Figure 2c shows the centered vertical and horizontal traces from  
3 these analyses. Significant roughness is observed on the steel that is not observed on the  
4 collected sample. This indicates that the sample could flow, i.e. had liquid characteristics at the  
5 time of sampling.

6

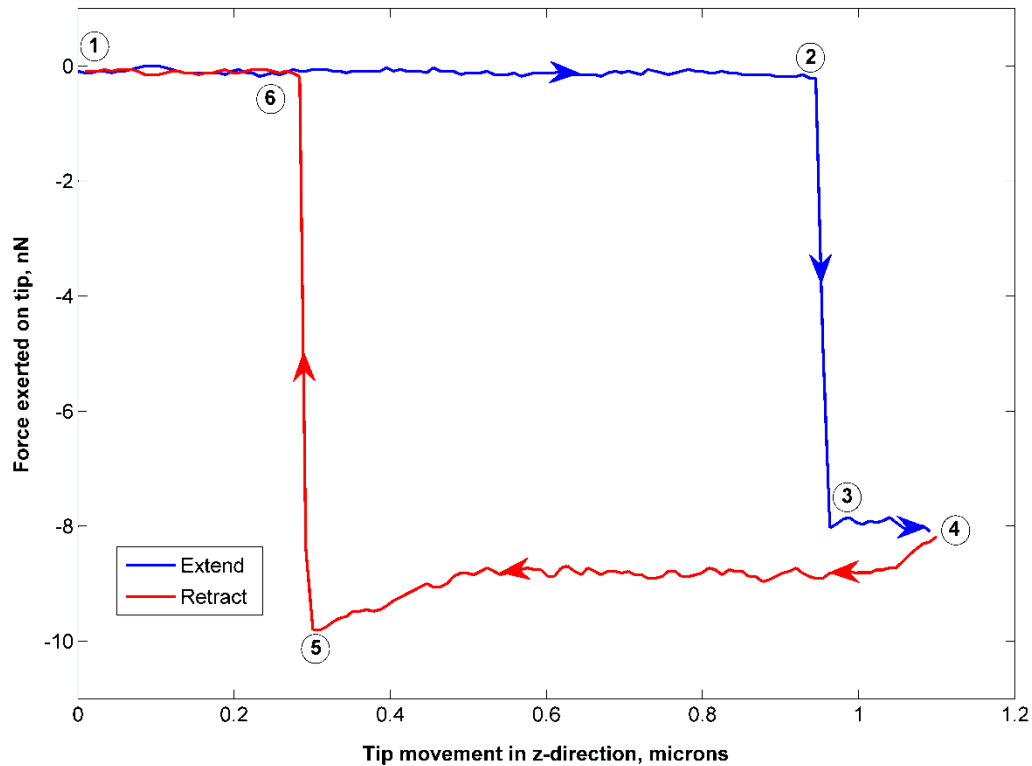

1

2

3 Figure 3. A typical force curve obtained using NaugaNeedle NN-HAR-FM60 probes and an

4 atomic force microscope. The blue line indicates the probe approaching the sample, and the red

5 line indicates the probe retracting from the sample. At point 1, the nanoneedle is approximately

6 1 micron from the surface of the liquid sample. At point 2, the nanoneedle is just above the

7 surface of the liquid. At point 3, the nanoneedle has touched the liquid, which wicks up and

8 exerts a downward force on the probe. At point 4, the nanoneedle begins to pull out of the

9 liquid. At point 5, the liquid is just about to break from the end of the nanoneedle, and the

10 contact angle of the liquid-needle interface approaches zero. At point 6, the nanoneedle has

11 pulled out of the liquid sample. The probe retracts back to point 1.

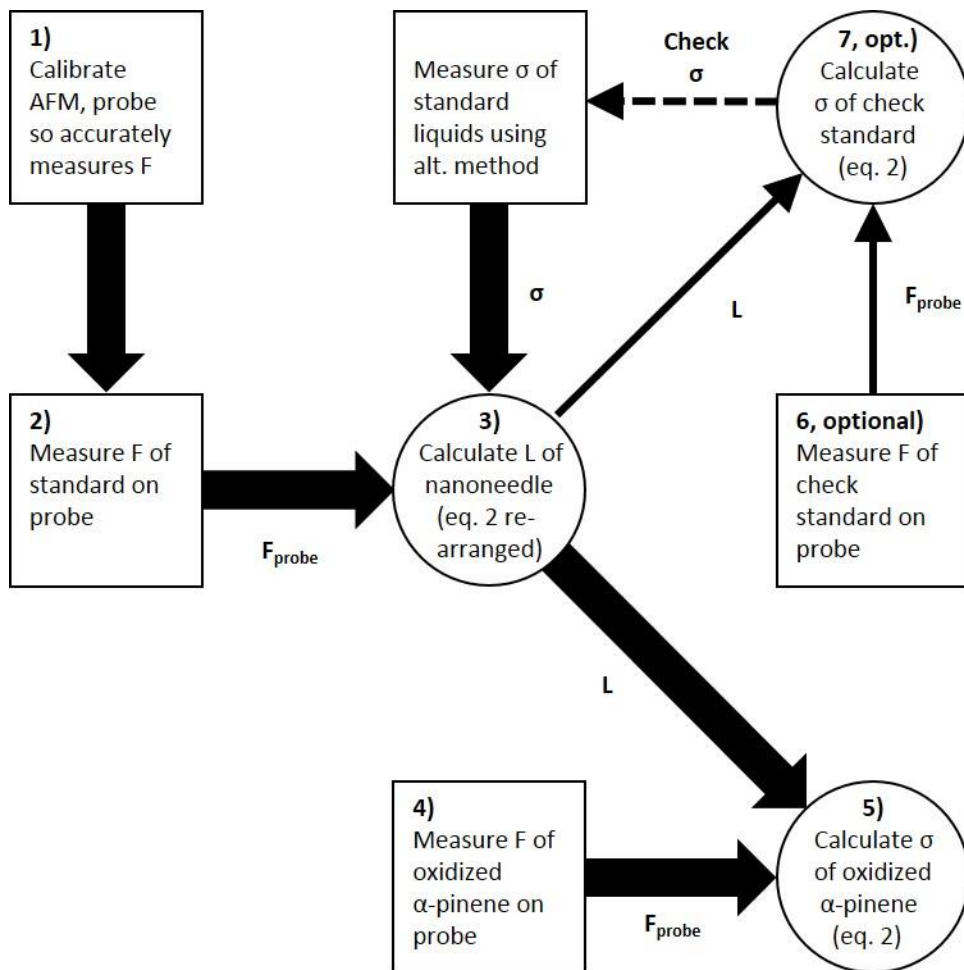

1  
 2 Figure 4. Procedure used to determine the surface tension of oxidized  $\alpha$ -pinene particles using  
 3 the AFM. The cantilever's spring constant was determined (step 1), which allowed the AFM to  
 4 obtain force curves. Force curves of a liquid standard were obtained (step 2), and the  
 5 nanoneedle's wetted perimeter was calculated with equation 2 given the standard's known  
 6 surface tension (step 3). Force curves of the oxidized  $\alpha$ -pinene sample were obtained (step 4),  
 7 and its surface tension was calculated with equation 2 given the nanoneedle's wetted perimeter  
 8 (step 5). For initial tests, a check standard was used to verify the validity of the wetted perimeter  
 9 and sample surface tension calculations (optional steps 6-7).<sup>b</sup>

10  
 11  
 12
